# Supplementary material for: Effect of CYP3A4 metabolism on sex differences in the pharmacokinetics and pharmacodynamics of zolpidem
Source: PubMed Central journal article supplement (PMC8476623; doi:10.1038/s41598-021-98689-z), 2021-09-27
Supplement: 41598_2021_98689_MOESM1_ESM.pdf [file 41598_2021_98689_MOESM1_ESM.pdf]

**Supplementary Table 1. Design information of studies that analyzed pharmacokinetics and/or pharmacodynamics of zolpidem**

| Reference No. | Number of subjects   |                      | Body weight (kg) <sup>a</sup> |            | IP                    | Route of administration | Parameters analyzed (PK and/or PD) |
|---------------|----------------------|----------------------|-------------------------------|------------|-----------------------|-------------------------|------------------------------------|
|               | Male                 | Female               | Male                          | Female     |                       |                         |                                    |
| 8             | 38                   | 32                   | 80                            | 65         | 10 mg IR, 12.5 mg MR  | PO                      | PK, PD                             |
| 13            | 10                   | 8                    | 75.3 (10.5)                   | 66.8 (8.7) | 10 mg IR              | PO                      | PK, PD                             |
| 14            | 21 (19) <sup>b</sup> | 15 (14) <sup>b</sup> | 81.5 (11.2)                   | 67.8 (9.7) | 3.5 mg ZST, 10 mg IR  | SL, PO                  | PK                                 |
| 15            | 13                   | 11                   | 80.3 (9.5)                    | 67.4 (7.8) | 1.0, 1.75, 3.5 mg ZST | SL                      | PK, PD                             |
| 16            | 8                    | 16                   | 76.4 (5.9)                    | 66.3 (6.6) | 5 mg IR               | PO                      | PK                                 |
| 17            | 25                   | 25                   | NA                            | NA         | 10 mg IR              | PO                      | PK                                 |
| 18            | 15                   | 9                    | 92 (10)                       | 73 (11)    | 1.75, 3.5 mg ZST      | SL                      | PK                                 |

<sup>a</sup> All values are presented as the arithmetic mean (standard deviation).

<sup>b</sup> The number of subjects included in the pharmacokinetic analysis are shown in parentheses.

Abbreviations: IP, investigational products; IR, immediate release; MR modified release; PD, pharmacodynamics; PK, pharmacokinetics; PO, per os (oral administration); SL, sublingual administration; ZST, zolpidem sublingual tablet

**Supplementary Table 2. Summary of pharmacokinetic parameters from reference articles**

| Reference No.   | IP                       | C <sub>max</sub> (ng mL <sup>-1</sup> ) |                | AUC <sub>last</sub> (ng h mL <sup>-1</sup> ) |                 | AUC <sub>inf</sub> (ng h mL <sup>-1</sup> ) |                 |
|-----------------|--------------------------|-----------------------------------------|----------------|----------------------------------------------|-----------------|---------------------------------------------|-----------------|
|                 |                          | Male                                    | Female         | Male                                         | Female          | Male                                        | Female          |
| 8 <sup>a</sup>  | 10 mg IR                 | 133                                     | 148            | NA                                           | NA              | 518                                         | 680             |
| 13              | 10 mg IR                 | 119 (40)                                | 140 (43)       | NA                                           | NA              | NA                                          | NA              |
| 14 <sup>a</sup> | 10 mg IR                 | 124 (37)                                | 177 (53)       | NA                                           | NA              | 533 (312)                                   | 740 (185)       |
| 15 <sup>a</sup> | 3.5 mg ZST               | 53 (14)                                 | 77 (24)        | 187 (65)                                     | 280 (96)        | 198 (72)                                    | 296 (106)       |
| 16              | 5 mg IR                  | 40 (16)                                 | 60 (19)        | NA                                           | NA              | 110 (68)                                    | 249 (133)       |
| 17              | 10 mg IR                 | 169.11 (70.2)                           | 217.83 (71.27) | 507.86 (246.34)                              | 784.20 (240.36) | 524.78 (260.03)                             | 831.63 (266.67) |
| 18 <sup>a</sup> | 3.5 mg ZST (non-elderly) | 60 (3.5)                                | 65. (6.4)      | 238 (22)                                     | 250 (44)        | 260 (27)                                    | 268 (51)        |

(continued)

| Reference No.   | T <sub>max</sub> (h) |             | CL/F (mL min <sup>-1</sup> ) |           | CL/F (weight normalized) (mL min <sup>-1</sup> kg <sup>-1</sup> ) |             | t <sub>1/2</sub> (h) |             | PK parameter with statistically significant sex difference                       |
|-----------------|----------------------|-------------|------------------------------|-----------|-------------------------------------------------------------------|-------------|----------------------|-------------|----------------------------------------------------------------------------------|
|                 | Male                 | Female      | Male                         | Female    | Male                                                              | Female      | Male                 | Female      |                                                                                  |
| 8 <sup>a</sup>  | NA                   | NA          | 305                          | 241       | 4                                                                 | 3.7         | 2.6                  | 2.9         | AUC <sub>inf</sub> , CL/F                                                        |
| 13              | 1.2 (0.35)           | 1.56 (1.18) | 486 (260)                    | 230 (60)  | 6.7 (4.3)                                                         | 3.5 (0.9)   | 1.64 (0.42)          | 2.65 (0.97) | CL/F, t <sub>1/2</sub>                                                           |
| 14 <sup>a</sup> | 0.5 (0.7)            | 0.8 (1.8)   | 316 (153)                    | 193 (54)  | 3.91 (2.12)                                                       | 2.88 (0.87) | 2.3 (0.9)            | 2.4 (0.5)   | no <i>p</i> values presented                                                     |
| 15 <sup>a</sup> | 0.6 (0.2)            | 0.7 (0.2)   | 307 (250)                    | 179 (66)  | 4.0 (3.7)                                                         | 2.7 (1.0)   | 2.4 (0.6)            | 2.5 (0.6)   | C <sub>max</sub> /dose, AUC <sub>last</sub> /dose AUC <sub>inf</sub> /dose, CL/F |
| 16              | 0.8 (0.3)            | 1.2 (0.4)   | 820 (445)                    | 376 (271) | 11.0 (6.4)                                                        | 5.8 (4.8)   | 1.5 (0.5)            | 2.4 (0.9)   | no <i>p</i> values presented                                                     |

|                 |                |                |                               |                              |                |             |                |             |                                                 |
|-----------------|----------------|----------------|-------------------------------|------------------------------|----------------|-------------|----------------|-------------|-------------------------------------------------|
| 17              | 0.94<br>(0.34) | 0.79<br>(0.28) | 458.5<br>(411.5) <sup>b</sup> | 226.3<br>(96.3) <sup>b</sup> | NA             | NA          | 2.02<br>(0.60) | 2.63 (0.70) | AUC <sub>last</sub> , AUC <sub>inf</sub> , CL/F |
| 18 <sup>a</sup> | 0.67           | 0.67           | 206 (20)                      | 225 (36)                     | 2.28<br>(0.25) | 3.25 (0.62) | 2.8 (0.2)      | 2.3 (0.3)   | no significant difference                       |

<sup>a</sup> Pharmacokinetic parameters of one dosage regimen are presented in this table for the studies that used several dosage regimens.

<sup>b</sup> The numbers are recalculated to match the unit (the unit was L h<sup>-1</sup> in the original article).

Note: All values are presented as arithmetic mean (standard deviation) or arithmetic mean only for the parameters presented with other formats such as range or CV% in the original articles.

Abbreviations: C<sub>max</sub>, maximum plasma concentration; T<sub>max</sub>, time to reach C<sub>max</sub>; AUC<sub>last</sub>, area under the concentration curve from 0 to last measurable time; AUC<sub>inf</sub>, area under the concentration curve from 0 to infinity; CL/F, apparent clearance; t<sub>1/2</sub>, half-life; IR, immediate release; PK, pharmacokinetic; NA, not available; ZST, zolpidem sublingual tablet
